# Supplementary material for: Chemical insight into the hydrothermal deposition of Sb2(S,Se)3 towards delicate microstructure engineering
Source: Royal Society of Chemistry journal article supplement (doi:10.1039/d2ta00893a), 2022-01-01
Supplement: d2ta00893a1.pdf [file d2ta00893a1.pdf]

## *Electronic supplementary information (ESI)*

### **Chemical insight into the hydrothermal deposition of $\text{Sb}_2(\text{S,Se})_3$ towards delicate microstructure engineering**

Yuqian Huang<sup>a,b</sup>, Rongfeng Tang<sup>a,b</sup>, Gang Wang<sup>c,\*</sup>, Gang Li<sup>a,b</sup>, Bo Che<sup>a,b</sup>, Yan Wang<sup>a,b</sup>,  
Weitao Lian<sup>a,b</sup>, Changfei Zhu<sup>a,b</sup> & Tao Chen<sup>a,b,\*</sup>

<sup>a</sup>Hefei National Laboratory for Physical Sciences at Microscale, CAS Key Laboratory of Materials for Energy Conversion, Department of Materials Science and Engineering, School of Chemistry and Materials Science, University of Science and Technology of China, Hefei 230026, China [tchenmse@ustc.edu.cn](mailto:tchenmse@ustc.edu.cn) (T.C.)

<sup>b</sup>Institute of Energy, Hefei Comprehensive National Science Center, Hefei, China

<sup>c</sup>State Key Laboratory of Rare Earth Resource Utilization, Changchun Institute of Applied Chemistry, Chinese Academy of Sciences, Changchun, Jilin 130022, China [wsu@ciac.ac.cn](mailto:wsu@ciac.ac.cn) (G.W.)

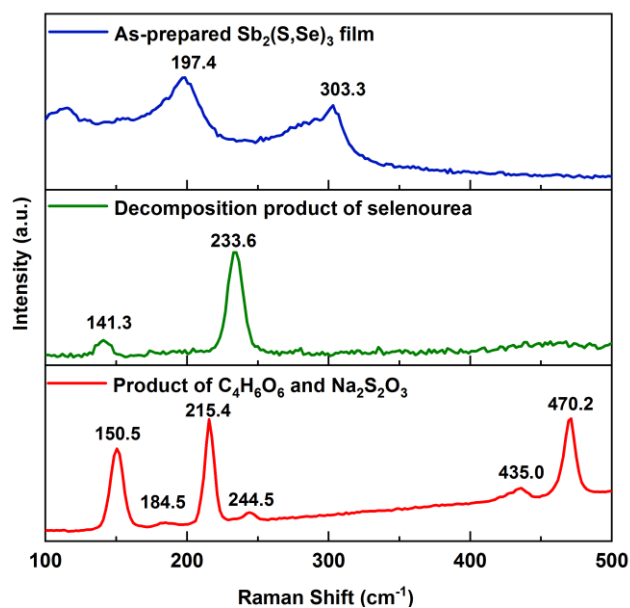

**Fig. S1** Raman spectra of the product of  $\text{C}_4\text{H}_6\text{O}_6$  and  $\text{Na}_2\text{S}_2\text{O}_3$ , the decomposition product of selenourea and the as-prepared  $\text{Sb}_2(\text{S,Se})_3$  film.

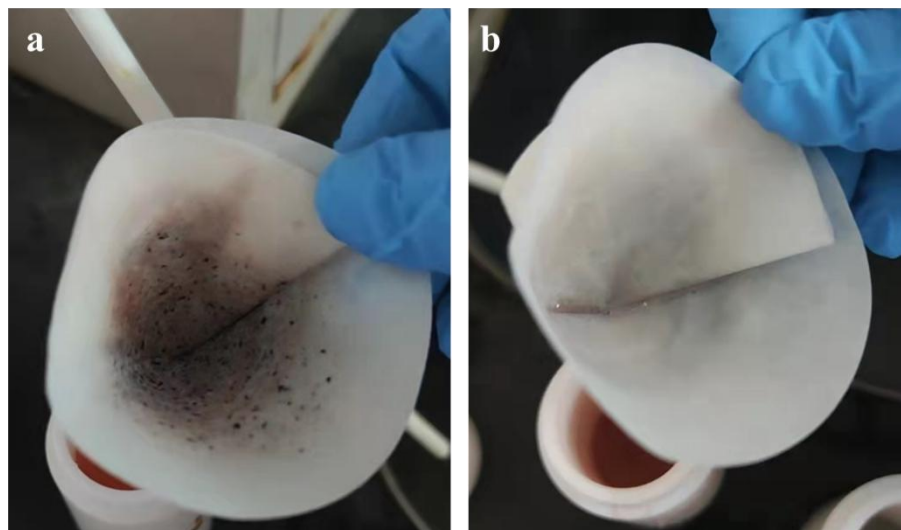

**Fig. S2** (a) The hydrothermal reaction with selenourea alone will get elemental Se. (b) Almost no elemental Se was formed when we used elemental S, selenourea and water to repeat the hydrothermal reaction.

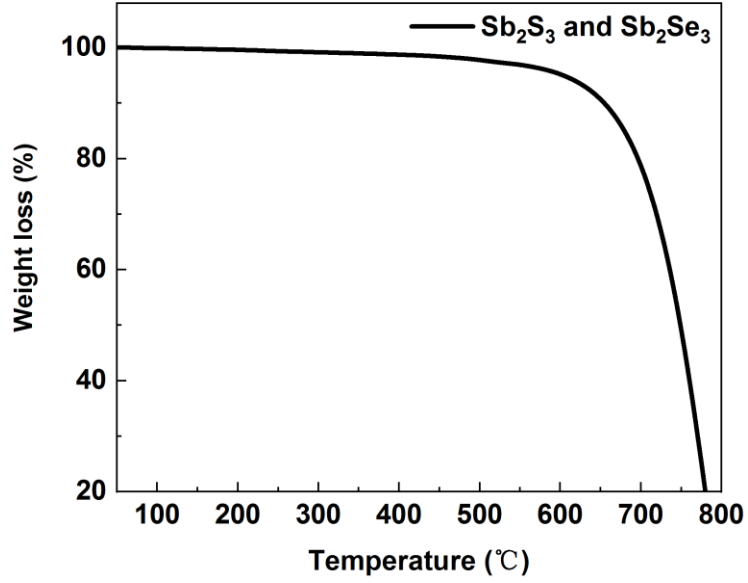

**Fig. S3** Thermogravimetric curve of Sb<sub>2</sub>S<sub>3</sub> and Sb<sub>2</sub>Se<sub>3</sub> mixture.

**Table S1** EDS data of as-prepared and annealed Sb<sub>2</sub>(S,Se)<sub>3</sub> films (atomic ratio (%)).

| Sample           | Sb    | Se    | S     | Cd   | Se/(S+Se) | (S+Se-Cd):Sb |
|------------------|-------|-------|-------|------|-----------|--------------|
| As-prepared film | 35.88 | 24.10 | 36.42 | 3.60 | 42.34     | 1.59:1       |
| Annealed film    | 38.18 | 22.76 | 34.68 | 4.38 | 42.89     | 1.39:1       |

**Table S2** Defect state, energy level ( $E_T$ ), cross-section ( $\sigma$ ), defect density ( $N_T$ ) of the detected defects in as-prepared Sb<sub>2</sub>(S,Se)<sub>3</sub> devices.

| Trap | $E_T$ (eV)  | $\sigma$ (cm <sup>2</sup> ) | $N_T$ (cm <sup>-3</sup> ) |
|------|-------------|-----------------------------|---------------------------|
| E1   | $E_C-0.548$ | $1.18 \times 10^{-17}$      | $2.10 \times 10^{14}$     |
| E2   | $E_C-0.762$ | $1.91 \times 10^{-15}$      | $1.84 \times 10^{14}$     |

**Table S3** EDS data of as-prepared and annealed  $\text{Sb}_2(\text{S,Se})_3$  films with zeolite additive (atomic ratio (%)).

| Sample           | Sb    | Se    | S     | Cd   | Se/(S+Se) | (S+Se-Cd):Sb |
|------------------|-------|-------|-------|------|-----------|--------------|
| As-prepared film | 34.89 | 24.89 | 36.33 | 3.89 | 43.41     | 1.64:1       |
| Annealed film    | 36.30 | 24.58 | 34.39 | 4.73 | 45.33     | 1.49:1       |

**Table S4** Defect state, energy level ( $E_T$ ), cross-section ( $\sigma$ ), defect density ( $N_T$ ) of the detected defects in as-prepared  $\text{Sb}_2(\text{S,Se})_3$  devices with zeolite additive.

| Trap | $E_T$ (eV)  | $\sigma$ (cm <sup>2</sup> ) | $N_T$ (cm <sup>-3</sup> ) |
|------|-------------|-----------------------------|---------------------------|
| H1   | $E_V+0.541$ | $6.86 \times 10^{-18}$      | $3.85 \times 10^{13}$     |

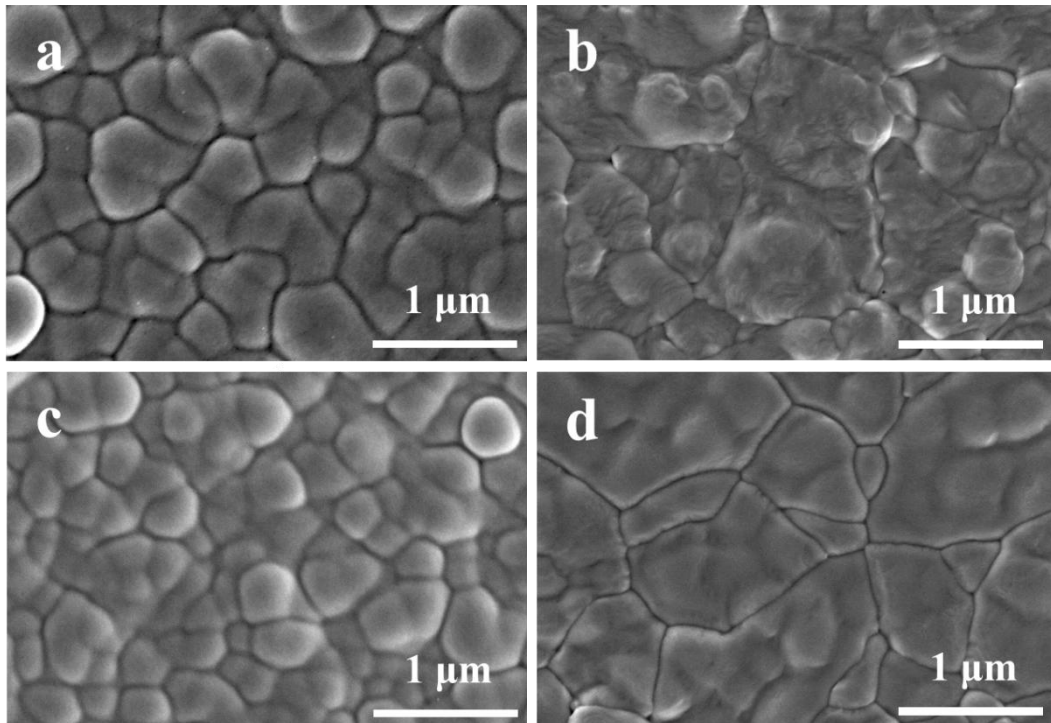

**Fig. S4** Surface SEM images of as-prepared (a) and annealed (b)  $\text{Sb}_2(\text{S,Se})_3$  W/O on the CdS/FTO/glass substrates. Surface SEM images of as-prepared (c) and annealed (d)  $\text{Sb}_2(\text{S,Se})_3$  W/ on the CdS/FTO/glass substrates.

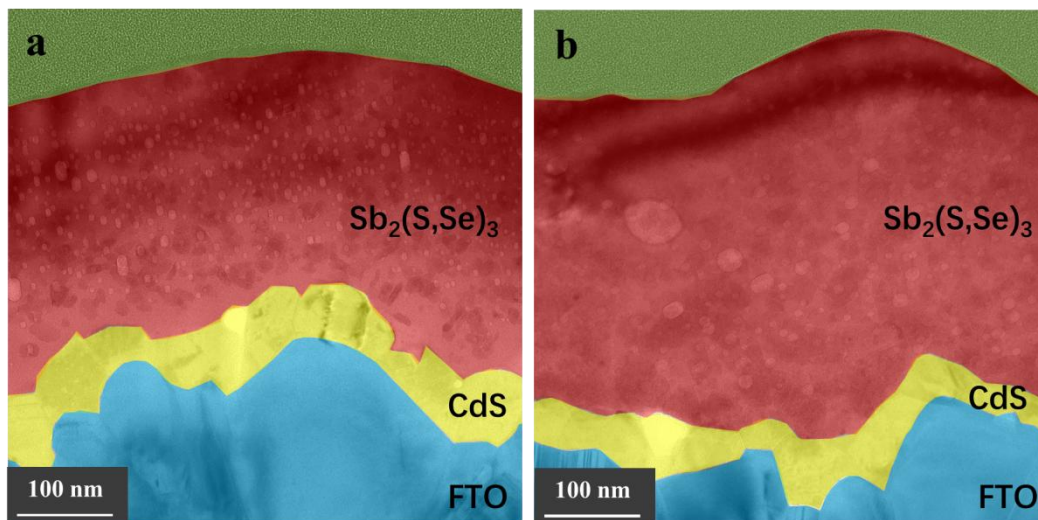

**Fig. S5** Cross-sectional HRTEM images of  $Sb_2(S,Se)_3/CdS$  heterojunction W/O (a) and W/ (b).

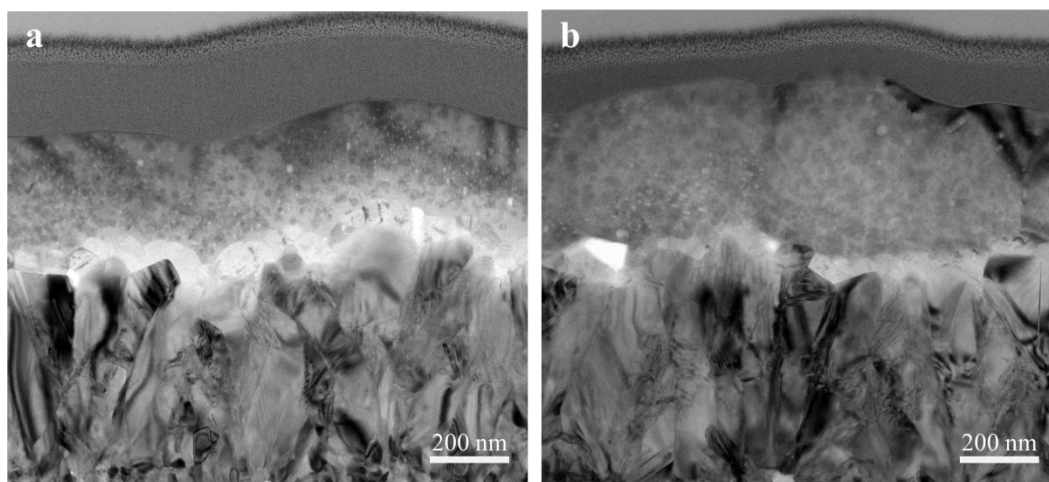

**Fig. S6** Cross-sectional TEM images of  $Sb_2(S,Se)_3/CdS$  heterojunction W/O (a) and W/ (b).

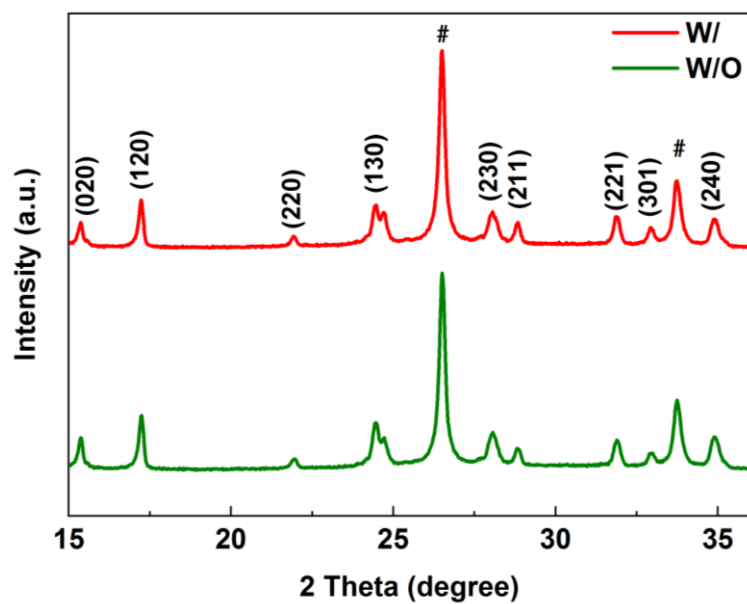

**Fig. S7** X-ray diffraction spectra of  $Sb_2(S,Se)_3$  W/O and W/.

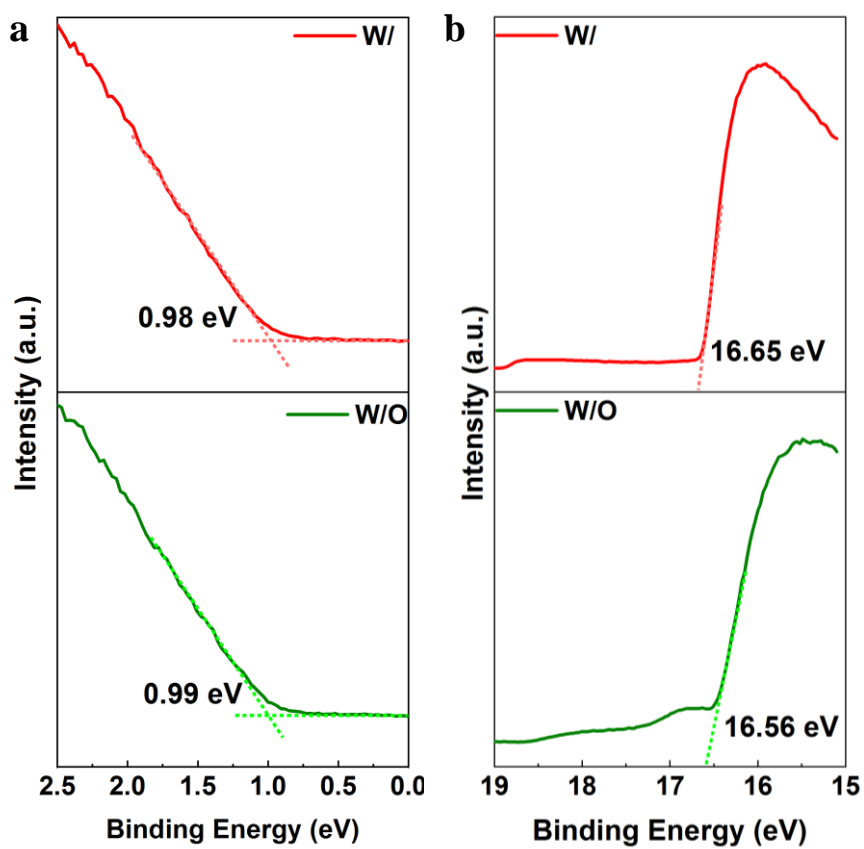

**Fig. S8** Magnified UPS spectra of samples W/O (a) and W/ (b).

**Table S5** The energy level parameters of  $\text{Sb}_2(\text{S,Se})_3$  W/O and W/ films.

| $\text{Sb}_2(\text{S,Se})_3$ | Band gap [eV] | Fermi level [eV] | VBM [eV] | CBM [eV] |
|------------------------------|---------------|------------------|----------|----------|
| W/O                          | 1.45          | -4.64            | -5.63    | -4.18    |
| W/                           | 1.43          | -4.55            | -5.53    | -4.10    |

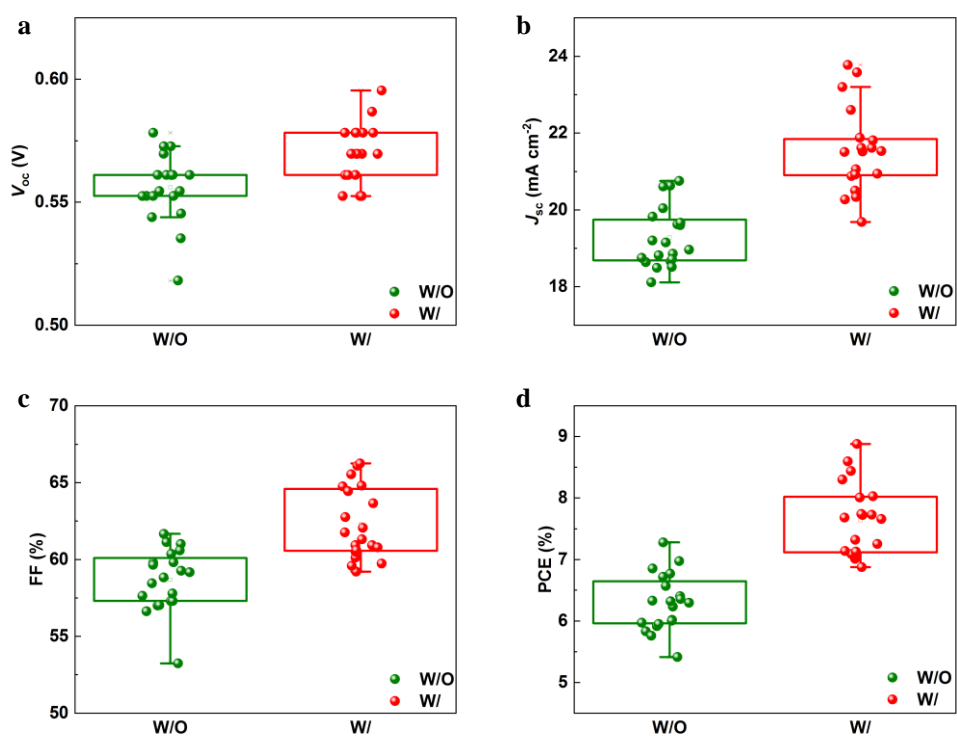

**Fig. S9** Statistical distribution of photovoltaic parameters for the  $\text{Sb}_2(\text{S,Se})_3$ -W/O and  $\text{Sb}_2(\text{S,Se})_3$ -W/ devices: (a) distribution of  $V_{oc}$ , (b) distribution of  $J_{sc}$ , (c) distribution of FF and (d) distribution of PCE, respectively.

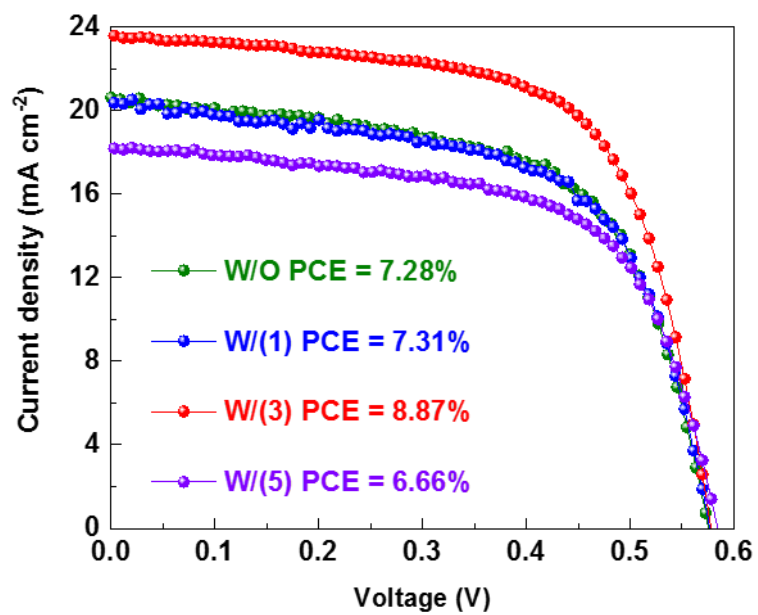

**Fig. S10** *J-V* characteristics of  $\text{Sb}_2(\text{S,Se})_3$  devices using different numbers of zeolite particles under standard AM 1.5G illumination.
